# Supplementary material for: Probability distributions of landslide volumes
Source: Copernicus journal article supplement (doi:10.5194/npg-16-179-2009), 2009-03-11

# Kernel density of $\log(V_L)$ – Fig. 1

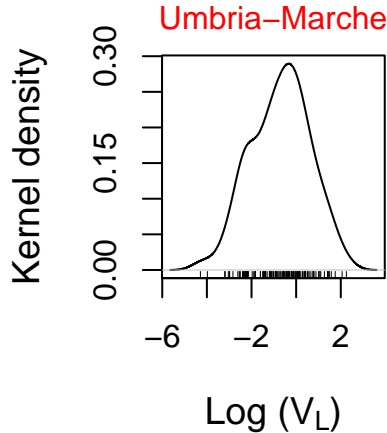

# Kernel density of $\log(V_L)$ – Fig. 1

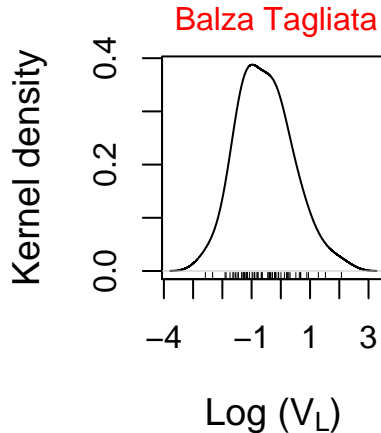

Comparison of kernel densities of  $\log(V_L)$  – Fig. 2

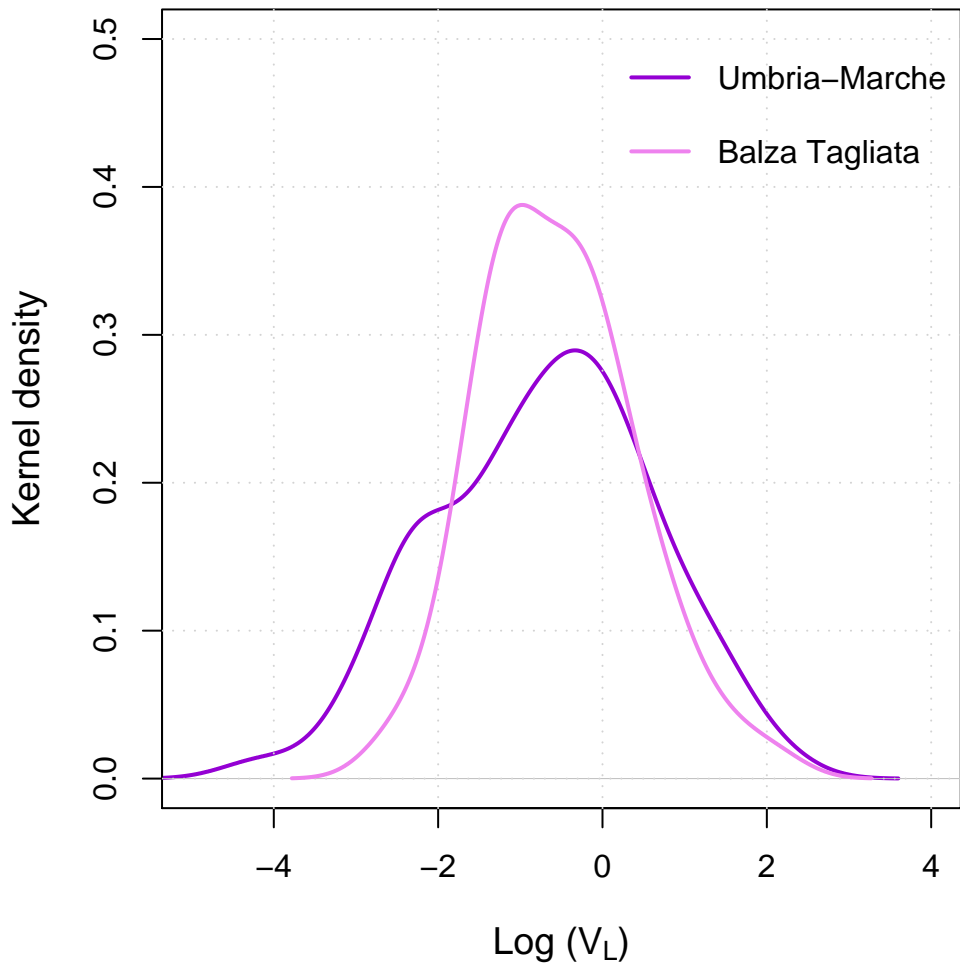

Comparison of frequency densities of  $\log(V_L)$  – Fig. 3

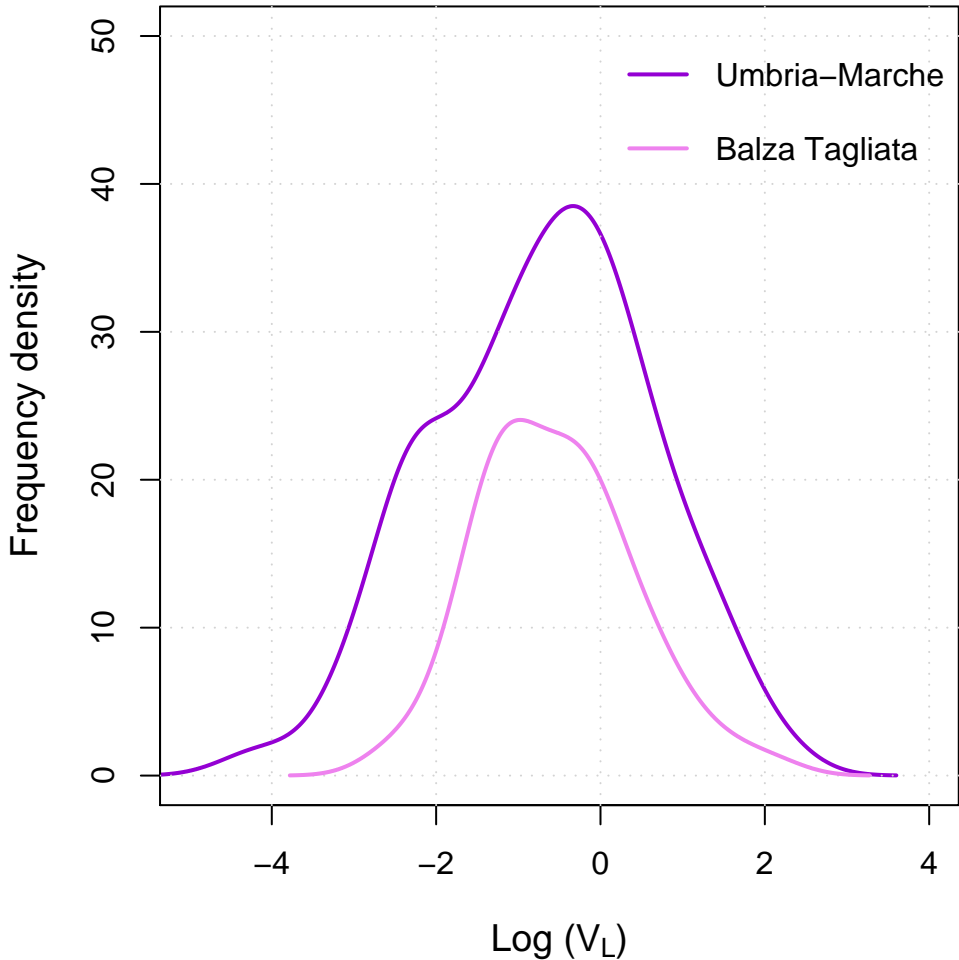

Comparison of probability densities – Fig. 4

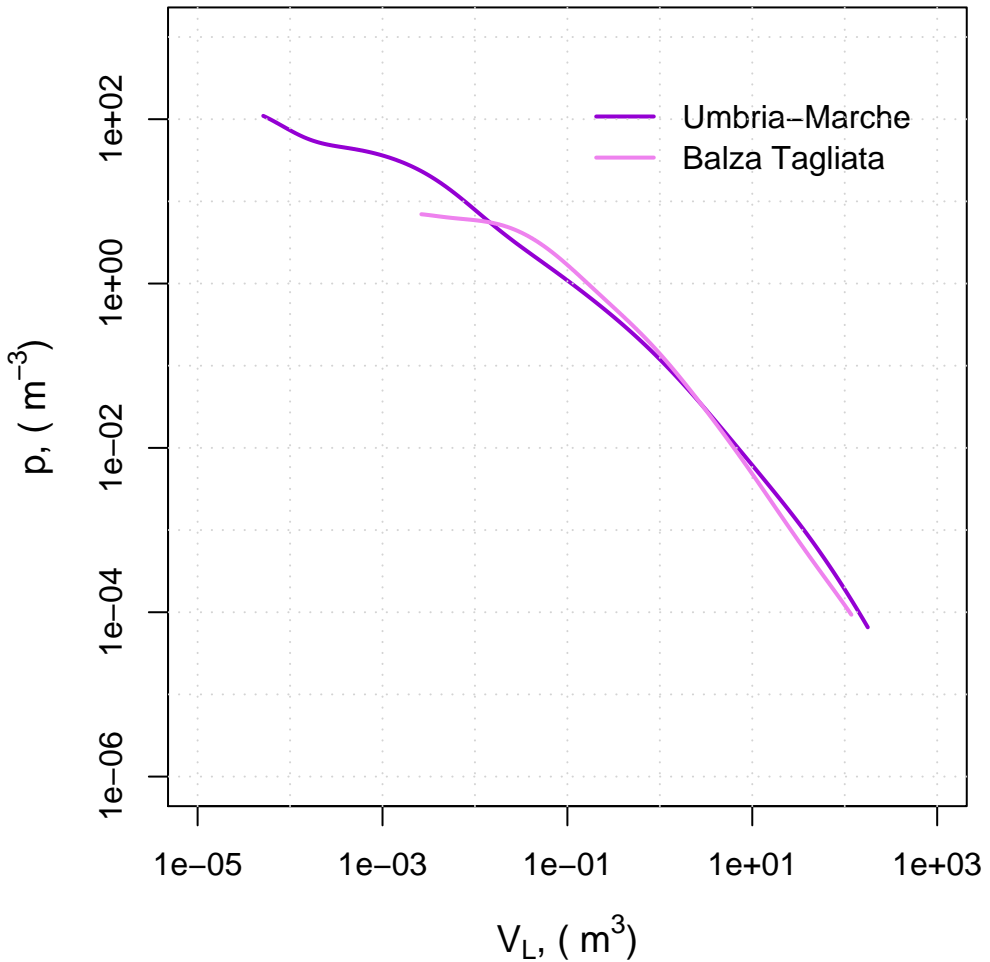

Linear fits of  $\log(p)$  – Fig. 5

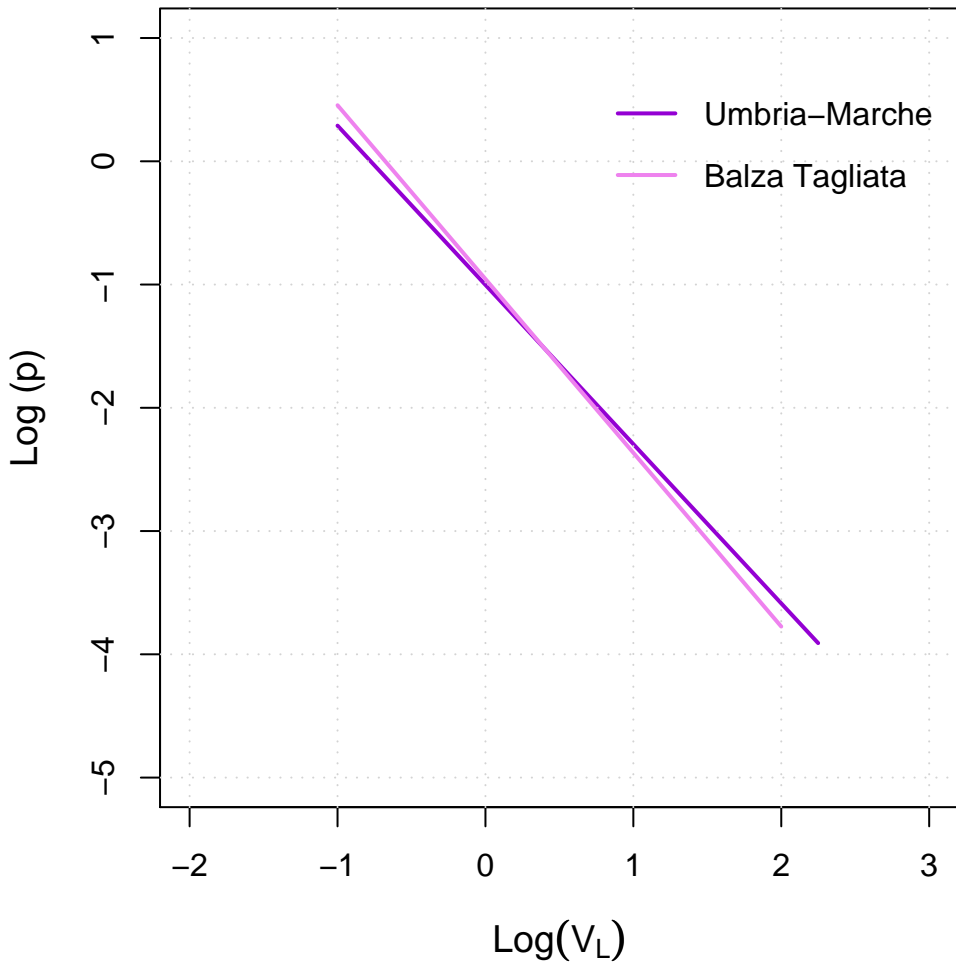

Comparison of frequency densities – Fig. 6

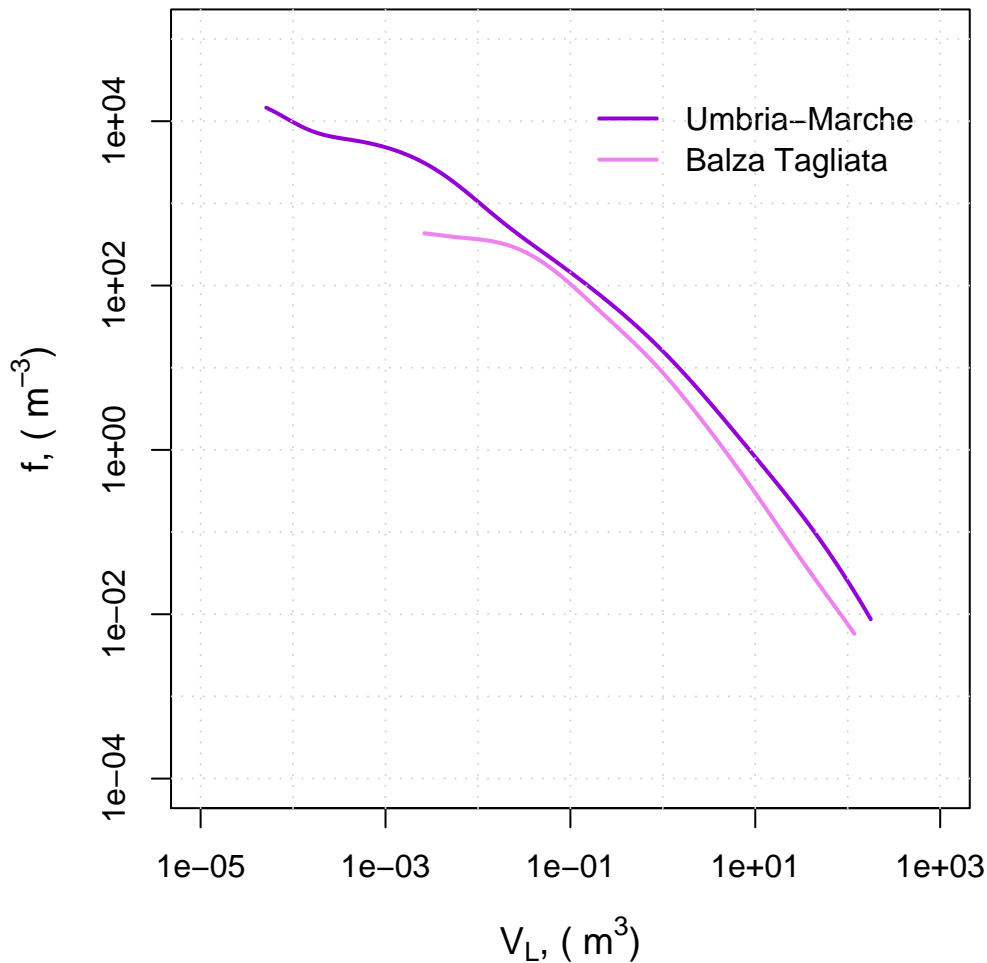

Linear fits of  $\log(f)$  – Fig. 7

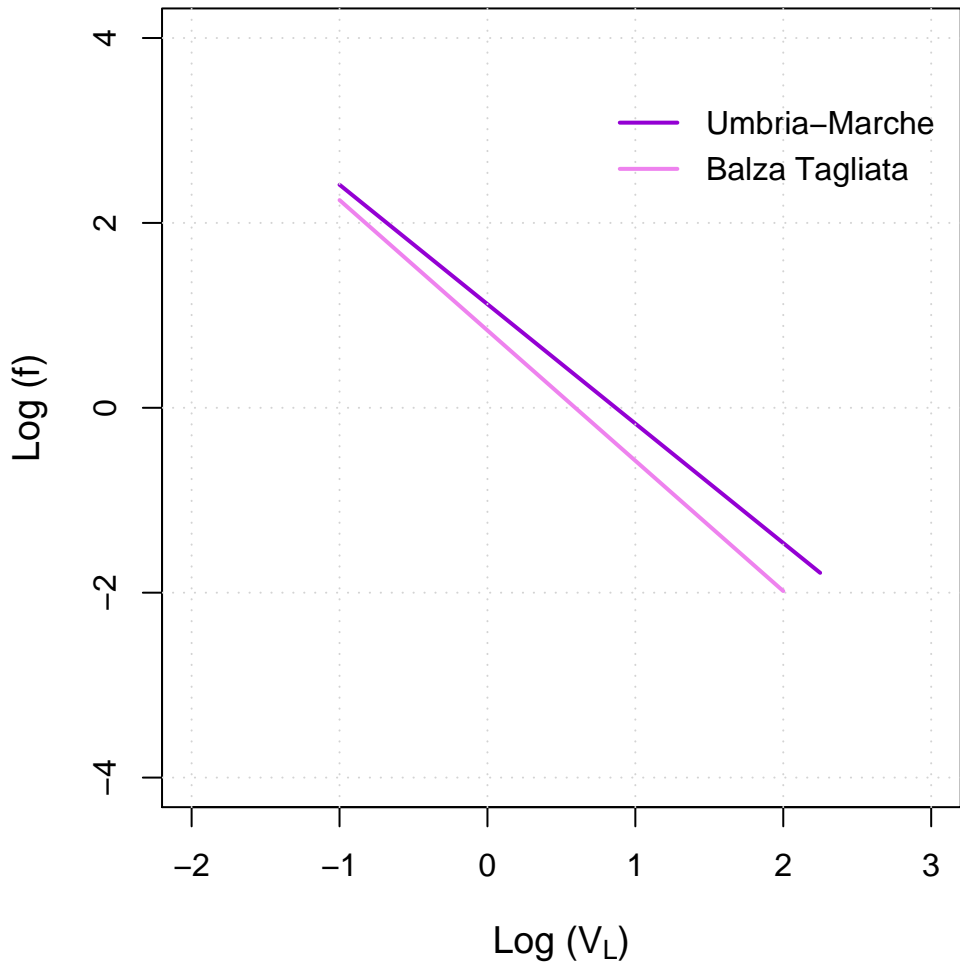

Fit of  $\log(f)$  – Fig. 8.1

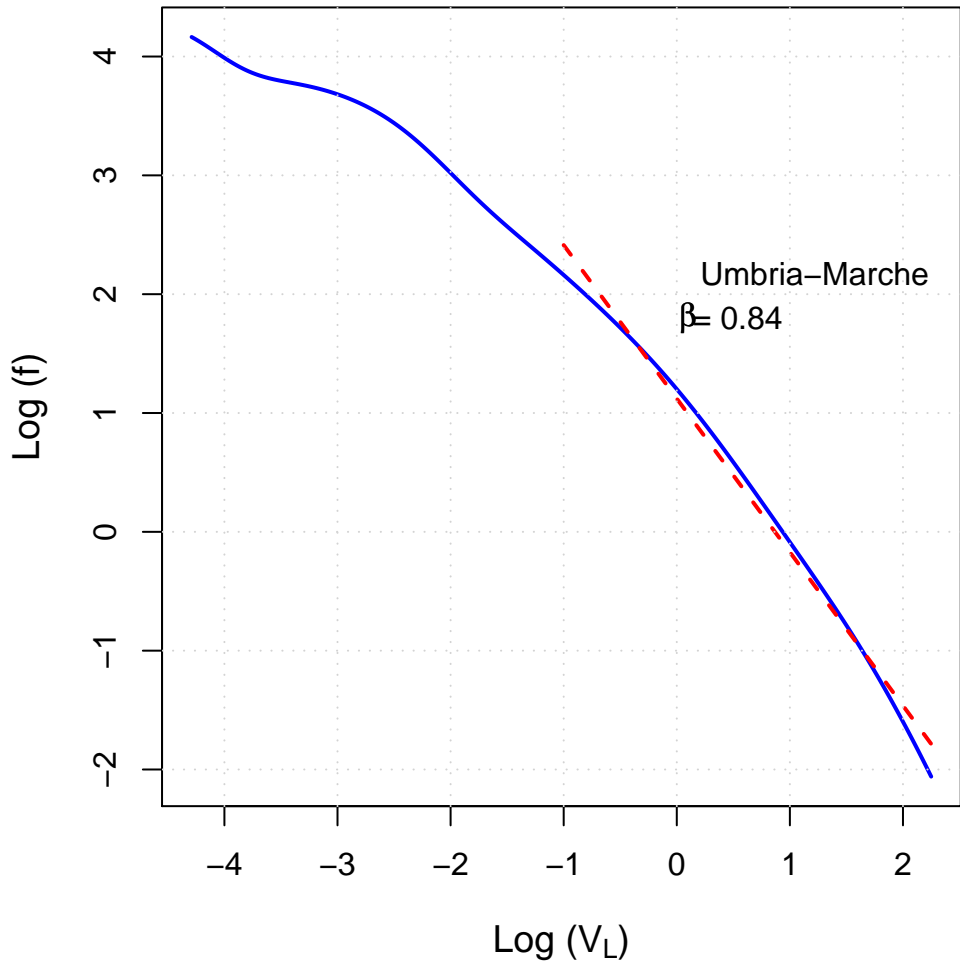



Fit of  $\log(f)$  – Fig. 8.2

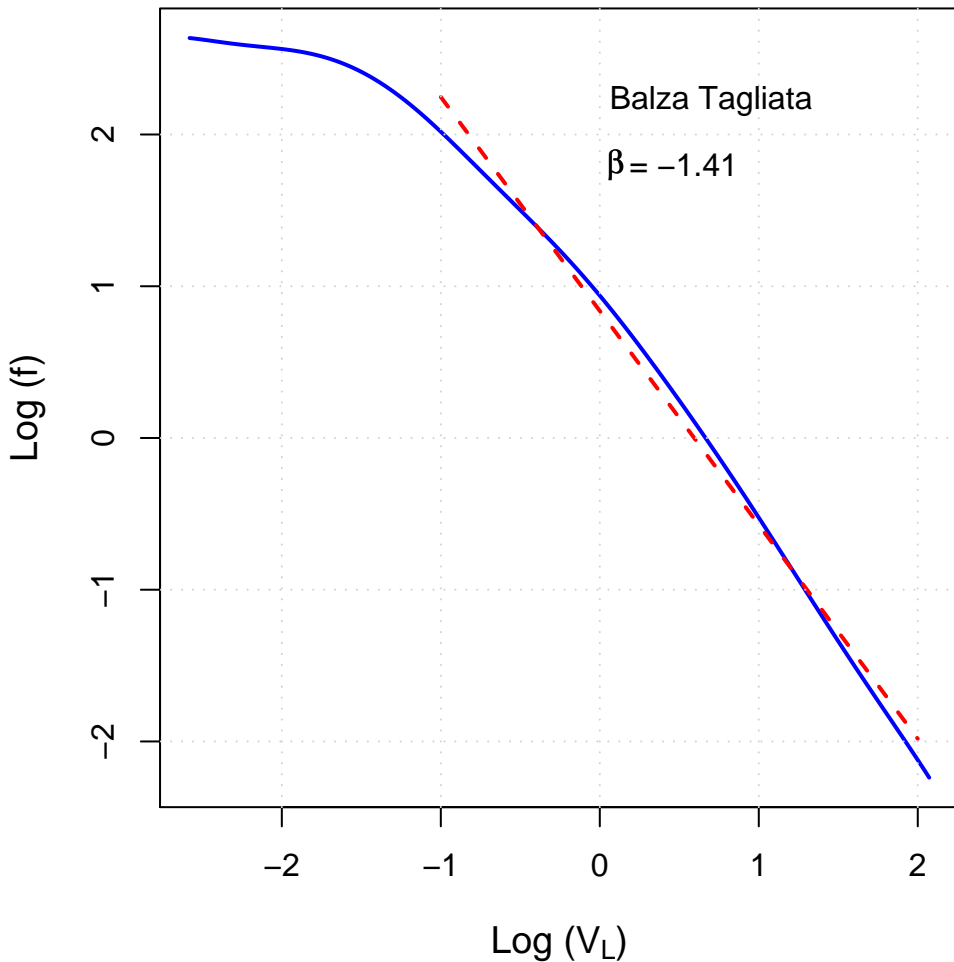

Supplement: Supplementary file 1 [file npg-16-179-2009-supplement.zip]
